# Supplementary material for: G-quadruplex DNA binding properties of novel nickel Schiff base complexes with four pendant groups
Source: Royal Society of Chemistry journal article supplement (doi:10.1039/d3dt02040a), 2023-01-01
Supplement: d3dt02040a2.pdf [file d3dt02040a2.pdf]

Supplementary Material

G-quadruplex DNA binding properties of novel nickel Schiff base complexes with four pendant groups

Nawal Assadawi,<sup>a,b</sup> Christopher Richardson<sup>a,b</sup> and Stephen Ralph<sup>a,b</sup>

<sup>a</sup> School of Chemistry and Molecular Bioscience, University of Wollongong, Northfields Avenue, Wollongong 2522, Australia

<sup>b</sup> Molecular Horizons, University of Wollongong, Northfields Avenue, Wollongong 2522, Australia

E-mail: sralph@uow.edu.au

**Table S1:** Crystal data and structure refinement for **(5)** and **(9)**.

| Identification code                                          | <b>(5)</b>                                                                    | <b>(9)</b>                                                                   |
|--------------------------------------------------------------|-------------------------------------------------------------------------------|------------------------------------------------------------------------------|
| Empirical formula                                            | C <sub>48.5</sub> ClH <sub>69</sub> N <sub>6</sub> NiO <sub>7</sub>           | C <sub>44</sub> H <sub>62</sub> N <sub>6</sub> NiO <sub>12</sub>             |
| Formula weight                                               | 942.25                                                                        | 925.70                                                                       |
| Temperature/K                                                | 150.00(10)                                                                    | 150.00(10)                                                                   |
| Crystal system                                               | Triclinic                                                                     | Monoclinic                                                                   |
| Space group                                                  | <i>P</i> -1                                                                   | <i>C</i> 2/ <i>c</i>                                                         |
| <i>a</i> /Å                                                  | 11.7197(8)                                                                    | 30.6127(5)                                                                   |
| <i>b</i> /Å                                                  | 12.5847(8)                                                                    | 15.8401(3)                                                                   |
| <i>c</i> /Å                                                  | 16.6523(10)                                                                   | 9.8494(2)                                                                    |
| $\alpha$ /°                                                  | 101.829(6)                                                                    | 90                                                                           |
| $\beta$ /°                                                   | 96.030(5)                                                                     | 96.209(2)                                                                    |
| $\gamma$ /°                                                  | 97.639(6)                                                                     | 90                                                                           |
| Volume/Å <sup>3</sup>                                        | 2360.3(3)                                                                     | 4748.04(15)                                                                  |
| <i>Z</i>                                                     | 2                                                                             | 4                                                                            |
| $\rho_{\text{calc}}/\text{cm}^3$                             | 1.326                                                                         | 1.295                                                                        |
| $\mu/\text{mm}^{-1}$                                         | 0.525                                                                         | 0.474                                                                        |
| <i>F</i> (000)                                               | 1006.0                                                                        | 1968.0                                                                       |
| Crystal size/mm <sup>3</sup>                                 | 0.51 × 0.22 × 0.03                                                            | 0.34 × 0.21 × 0.06                                                           |
| Radiation                                                    | Mo K $\alpha$ ( $\lambda$ = 0.71073)                                          | MoK $\alpha$ ( $\lambda$ = 0.71073)                                          |
| 2 $\theta$ range for data collection/°                       | 3.718 to 57.396                                                               | 4.768 to 59.15                                                               |
| Index ranges                                                 | -15 ≤ <i>h</i> ≤ 15, -17 ≤ <i>k</i> ≤ 16, -22 ≤ <i>l</i> ≤ 22                 | -42 ≤ <i>h</i> ≤ 42, -22 ≤ <i>k</i> ≤ 21, -13 ≤ <i>l</i> ≤ 13                |
| Reflections collected                                        | 55431                                                                         | 64511                                                                        |
| Independent reflections                                      | 11983 [ <i>R</i> <sub>int</sub> = 0.0589, <i>R</i> <sub>sigma</sub> = 0.0567] | 6653 [ <i>R</i> <sub>int</sub> = 0.0328, <i>R</i> <sub>sigma</sub> = 0.0214] |
| Data/restraints/parameters                                   | 11983/0/560                                                                   | 6653/0/288                                                                   |
| Goodness-of-fit on <i>F</i> <sup>2</sup>                     | 1.058                                                                         | 1.050                                                                        |
| Final <i>R</i> indexes [ <i>I</i> ≥ 2 $\sigma$ ( <i>I</i> )] | <i>R</i> <sub>1</sub> = 0.0437, <i>wR</i> <sub>2</sub> = 0.0990               | <i>R</i> <sub>1</sub> = 0.0348, <i>wR</i> <sub>2</sub> = 0.0989              |
| Final <i>R</i> indexes [all data]                            | <i>R</i> <sub>1</sub> = 0.0681, <i>wR</i> <sub>2</sub> = 0.1076               | <i>R</i> <sub>1</sub> = 0.0432, <i>wR</i> <sub>2</sub> = 0.1028              |
| Largest diff. peak/hole / e Å <sup>-3</sup>                  | 0.42/-0.71                                                                    | 0.52/-0.65                                                                   |
| CCDC                                                         | 2271794                                                                       | 2271795                                                                      |

**Table S2:** Binding free energies obtained from docking studies performed using nickel Schiff base complexes and either 1KF1 or 1KBD.

| Complex     | 1KF1(qDNA)                            |                           | 1KBD (dsDNA)                          |                           |
|-------------|---------------------------------------|---------------------------|---------------------------------------|---------------------------|
|             | $\Delta G$<br>(kcal/mol) <sup>a</sup> | Binding mode <sup>b</sup> | $\Delta G$<br>(kcal/mol) <sup>a</sup> | Binding mode <sup>b</sup> |
| <b>(5)</b>  | $-9.64 \pm 0.05$                      | Top, end stacking         | $-8.8 \pm 0.10$                       | Minor groove              |
| <b>(9)</b>  | $-9.86 \pm 0.05$                      | Top, end stacking         | $-8.78 \pm 0.08$                      | Minor groove              |
| <b>(10)</b> | $-9.42 \pm 0.04$                      | Top, end stacking         | $-8.3 \pm 0.20$                       | Minor groove              |

<sup>a</sup> Average values of  $\Delta G$  with standard errors obtained from the top five docking scores.

<sup>b</sup> "Top" or "Bottom" indicates which terminal G-tetrad was the preferred binding site.

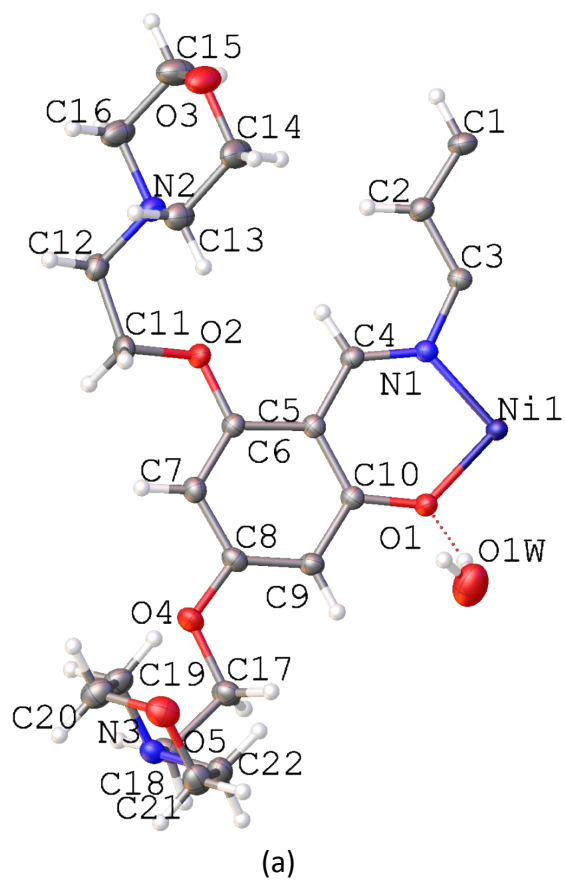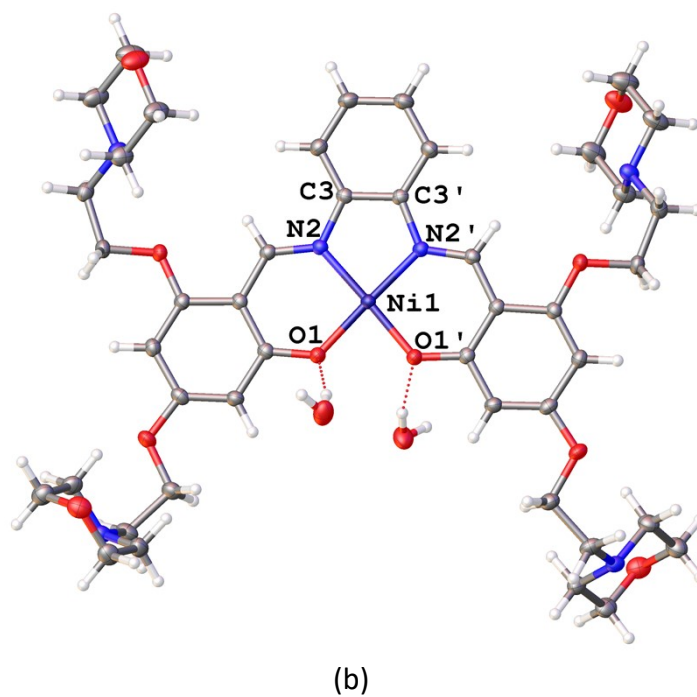

**Figure S1:** (a) Additional illustrations of the molecular structure of **(9)**. (a) Asymmetric unit with displacement ellipsoids set to 50%. (b) Complex together with locations of both partial water molecules.

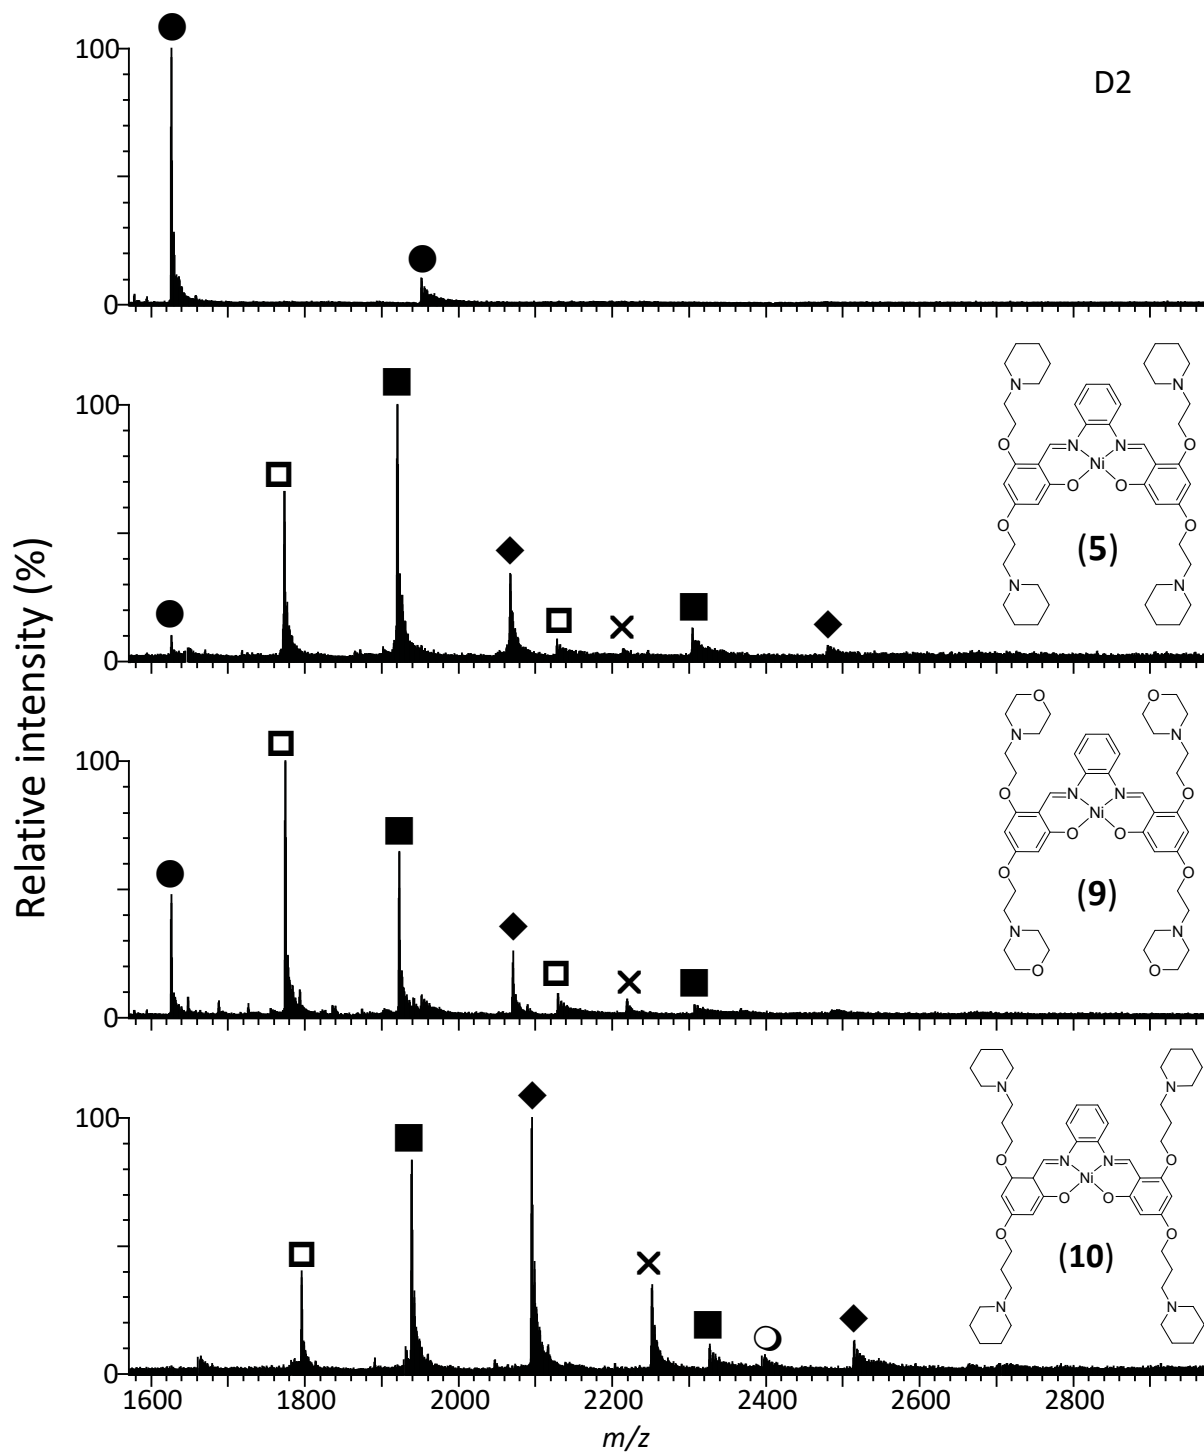

**Figure S2:** Negative ion ESI mass spectra of solutions containing different nickel Schiff base complexes and D2 at a 6:1 ratio. ● = Free D2; ◻ =  $[D2 + 1(Ni)]$ ; ◼ =  $[D2 + 2(Ni)]$ ; ◆ =  $[D2 + 3(Ni)]$ ; ✕ =  $[D2 + 4(Ni)]$ ; ○ =  $[D2 + 5(Ni)]$ .

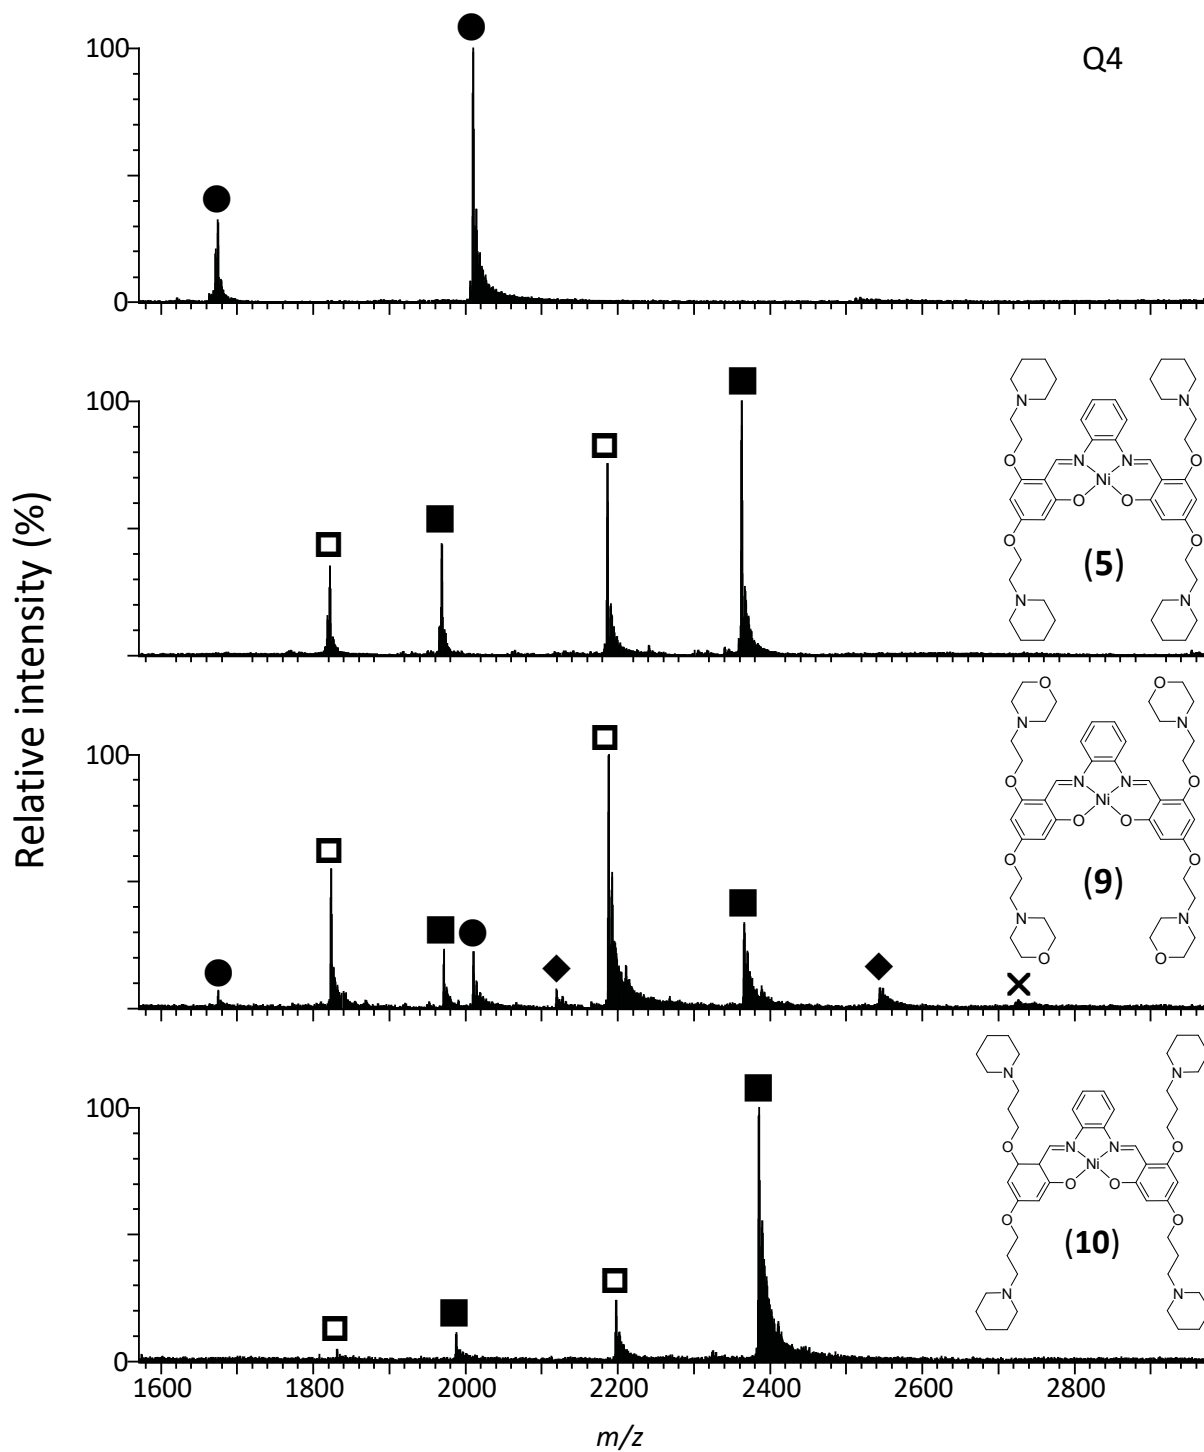

**Figure S3:** Negative ion ESI mass spectra of solutions containing different nickel Schiff base complexes and Q4 at a 6:1 ratio. ● = Free Q4; ◻ = [Q4 + 1(Ni)]; ◼ = [Q4 + 2(Ni)]; ◆ = [Q4 + 3(Ni)]; ✕ = [Q4 + 4(Ni)]; ○ = [Q4 + 5(Ni)].

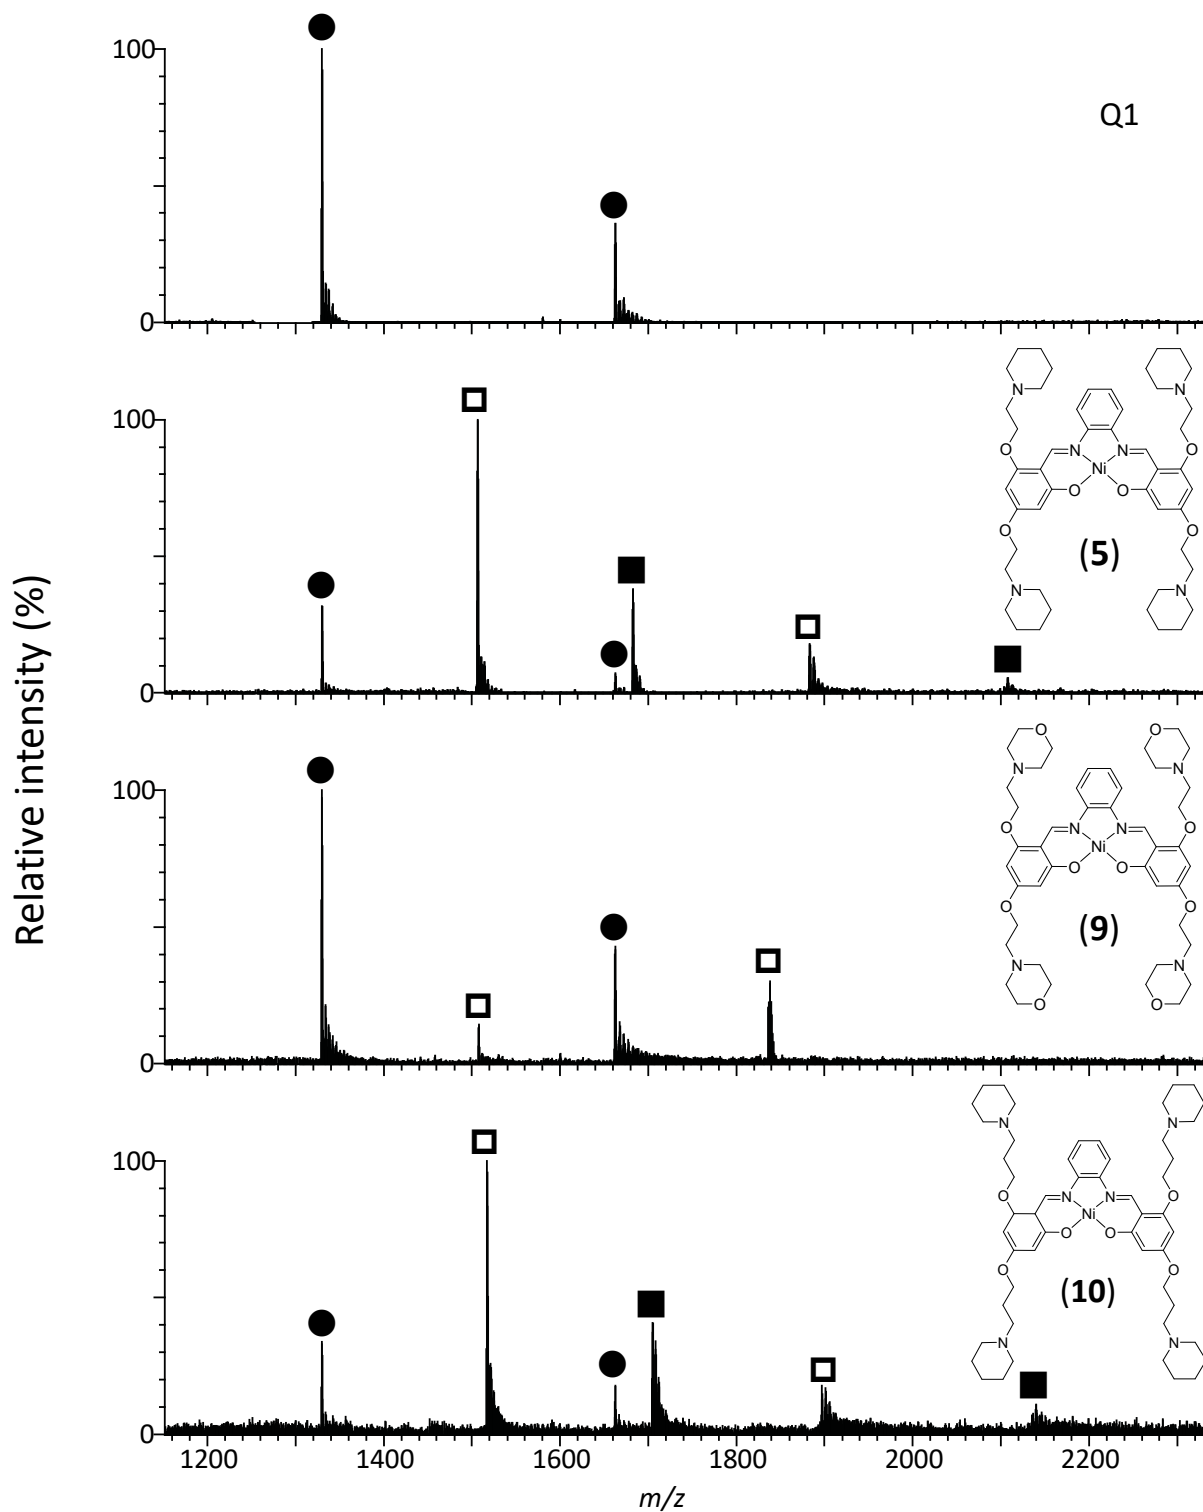

**Figure S4:** Negative ion ESI mass spectra of solutions containing different nickel Schiff base complexes and Q1 at a 6:1 ratio. ● = Free Q1; □ = [Q1 + 1(Ni)]; ■ = [Q1 + 2(Ni)]; ◆ = [Q1 + 3(Ni)]; × = [Q1 + 4(Ni)]; ○ = [Q1 + 5(Ni)].

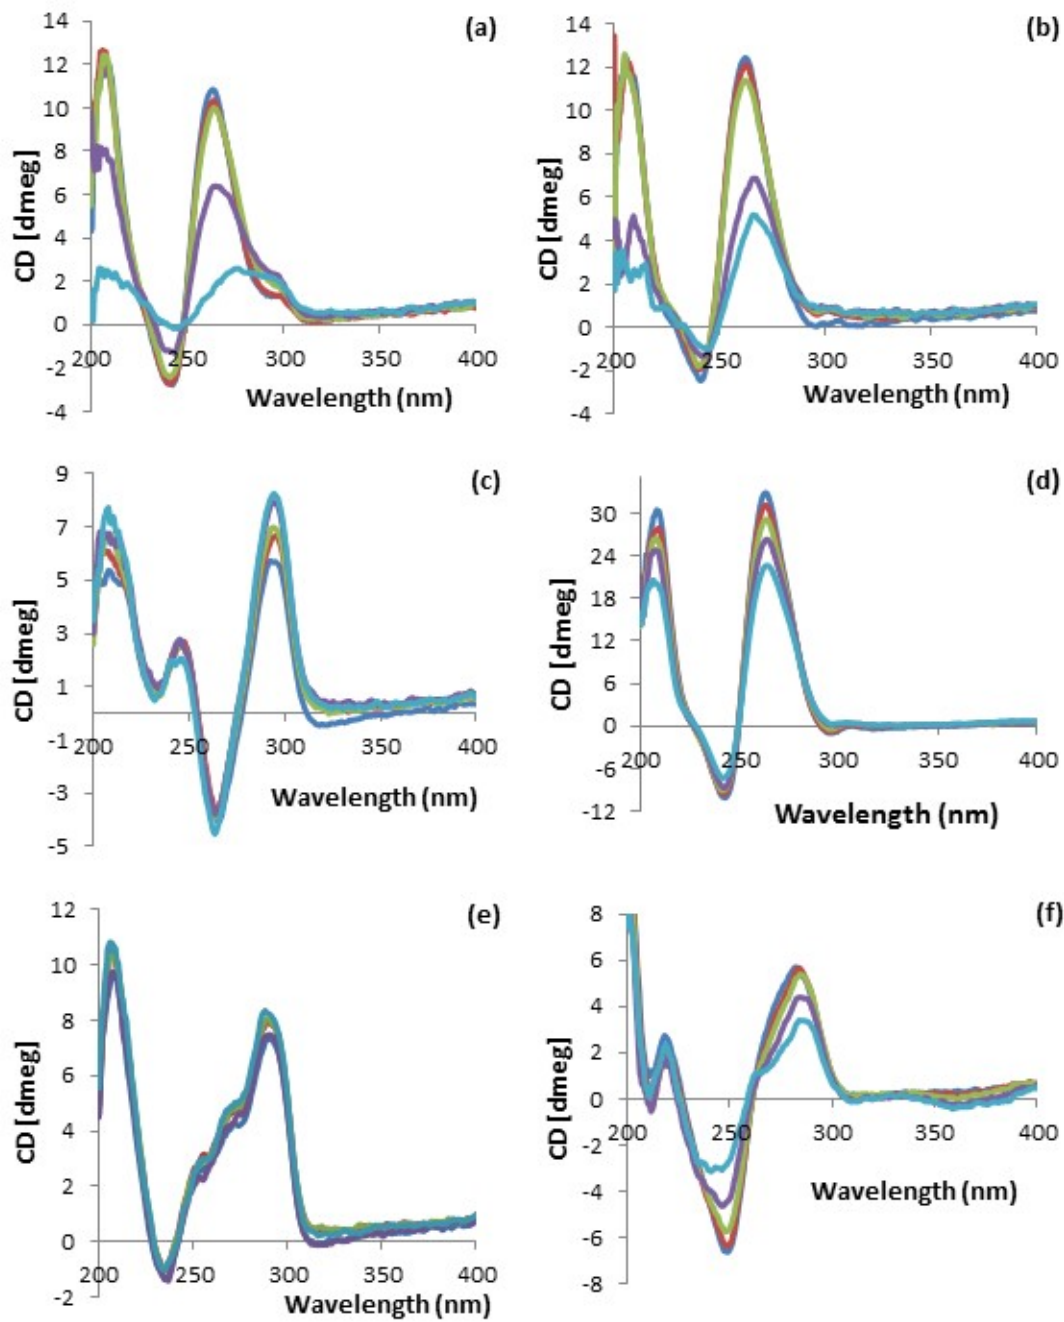

— Ni:DNA 0:1 — Ni:DNA 1:1 — Ni:DNA 3:1 — Ni:DNA 6:1 — Ni:DNA 9:1

**Figure S5:** Circular dichroism spectra of solutions containing varying ratios of (9) and different DNA molecules: (a) Parallel Q1; (b) Parallel c-kit1; (c) Anti-parallel Q1; (d) Parallel Q4; (e) Hybrid Q1 and (f) D2.



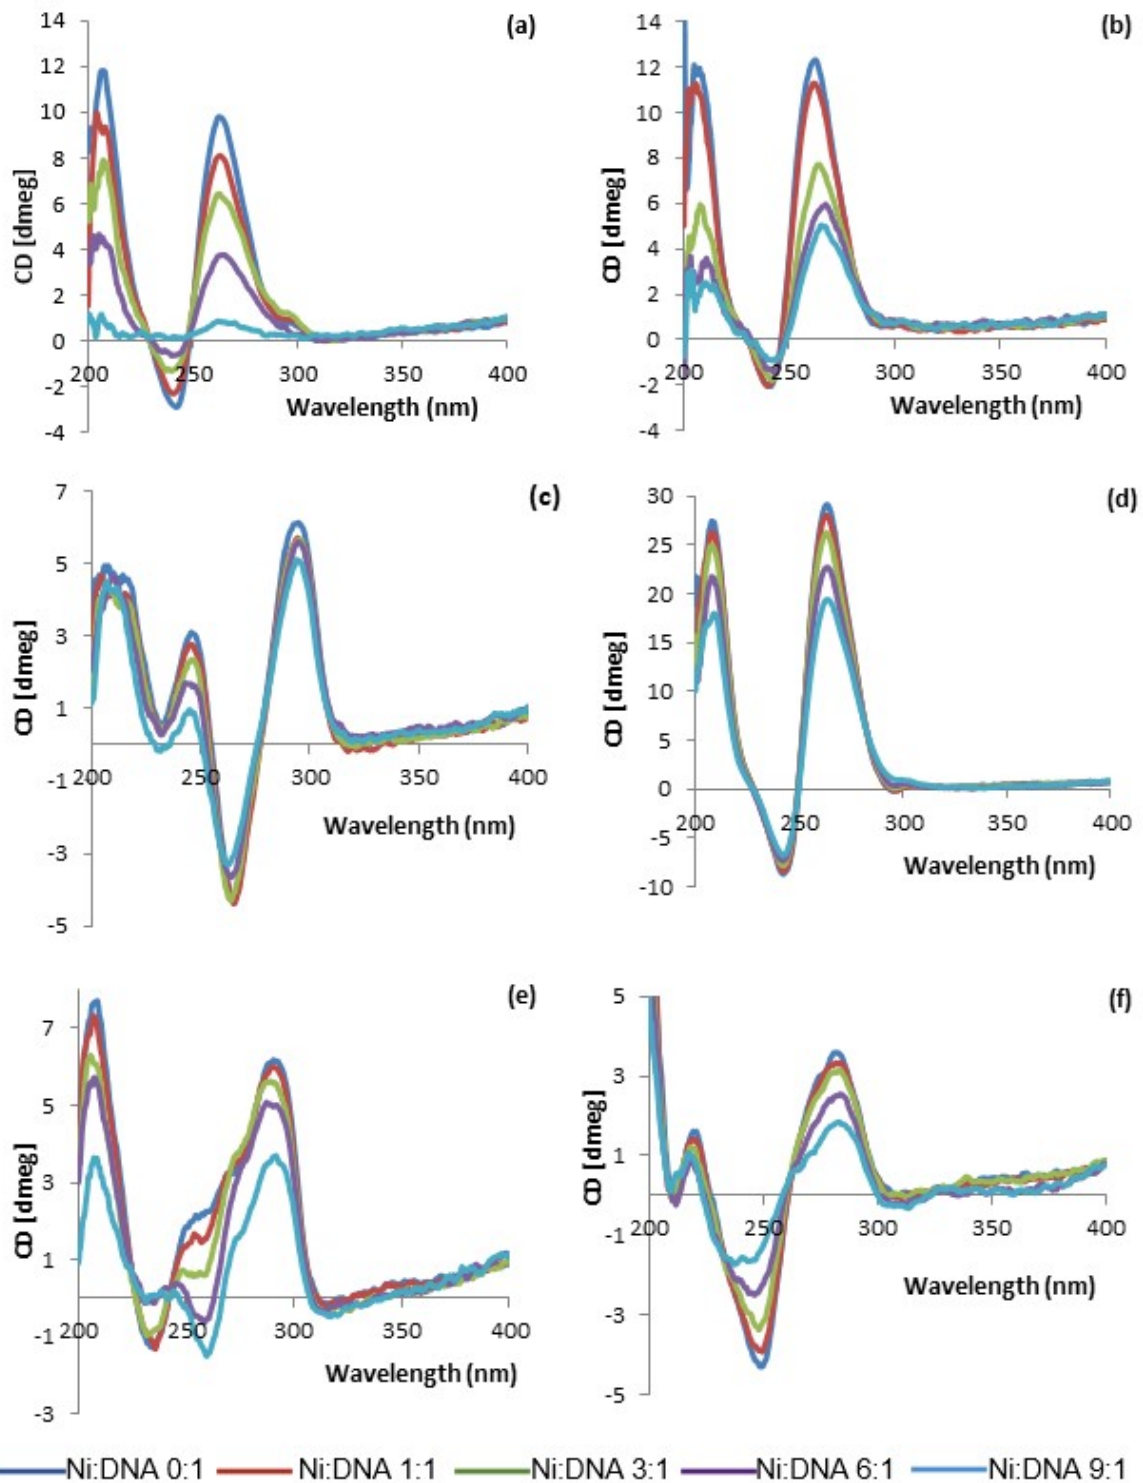

**Figure S6:** Circular dichroism spectra of solutions containing varying ratios of (5) and different DNA molecules: (a) Parallel Q1; (b) Parallel c-kit1; (c) Anti-parallel Q1; (d) Parallel Q4; (e) Hybrid Q1 and (f) D2.

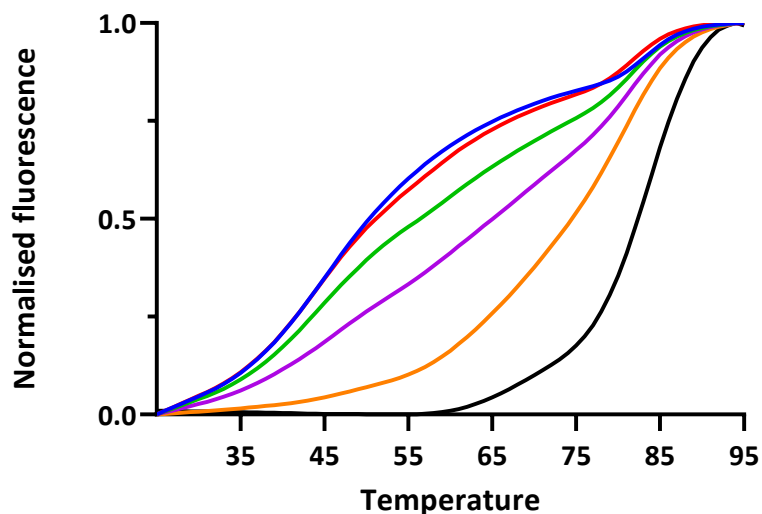

**Figure S7:** Results obtained from FRET melting assays performed using anti-parallel F21T and increasing concentrations of (5).

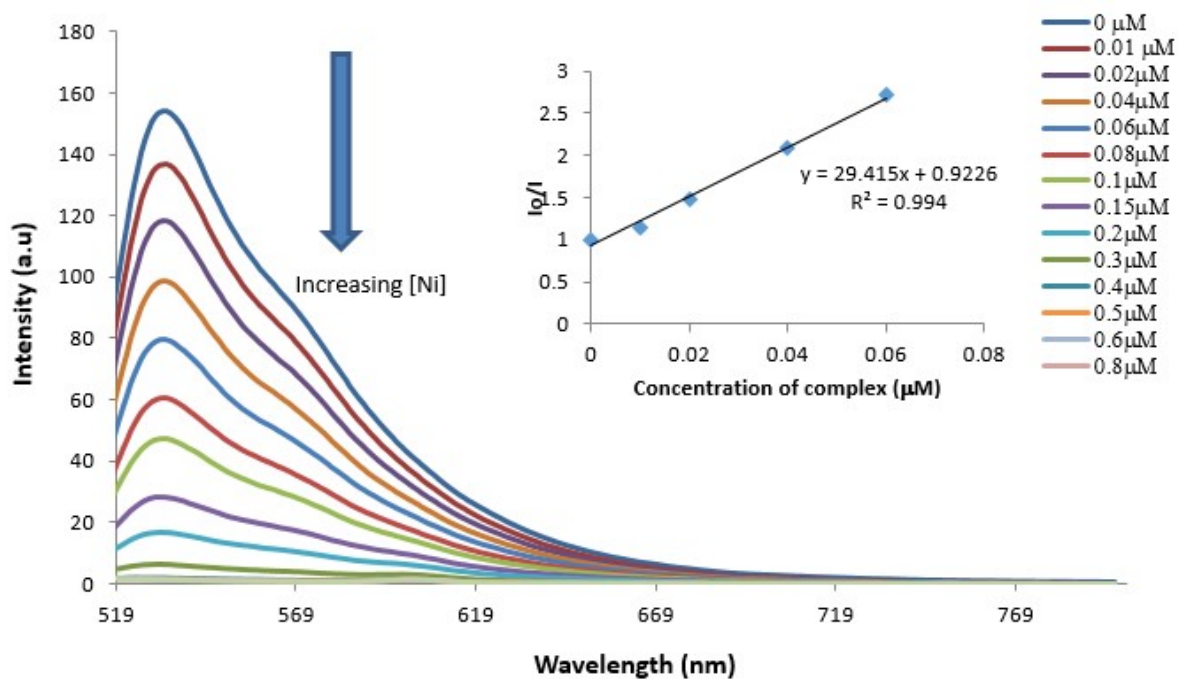

**Figure S8:** Results from an FID assay performed by adding increasing amounts of (10) to a solution containing thiazole orange and parallel Q4. The inset shows a Stern-Volmer plot derived from the data, which was then used to determine the  $DC_{50}$  for the nickel complex.
