# Supplementary figures and images for: G-quadruplex DNA binding properties of novel nickel Schiff base complexes with four pendant groups
Source: Royal Society of Chemistry journal article supplement (doi:10.1039/d3dt02040a), 2023-01-01

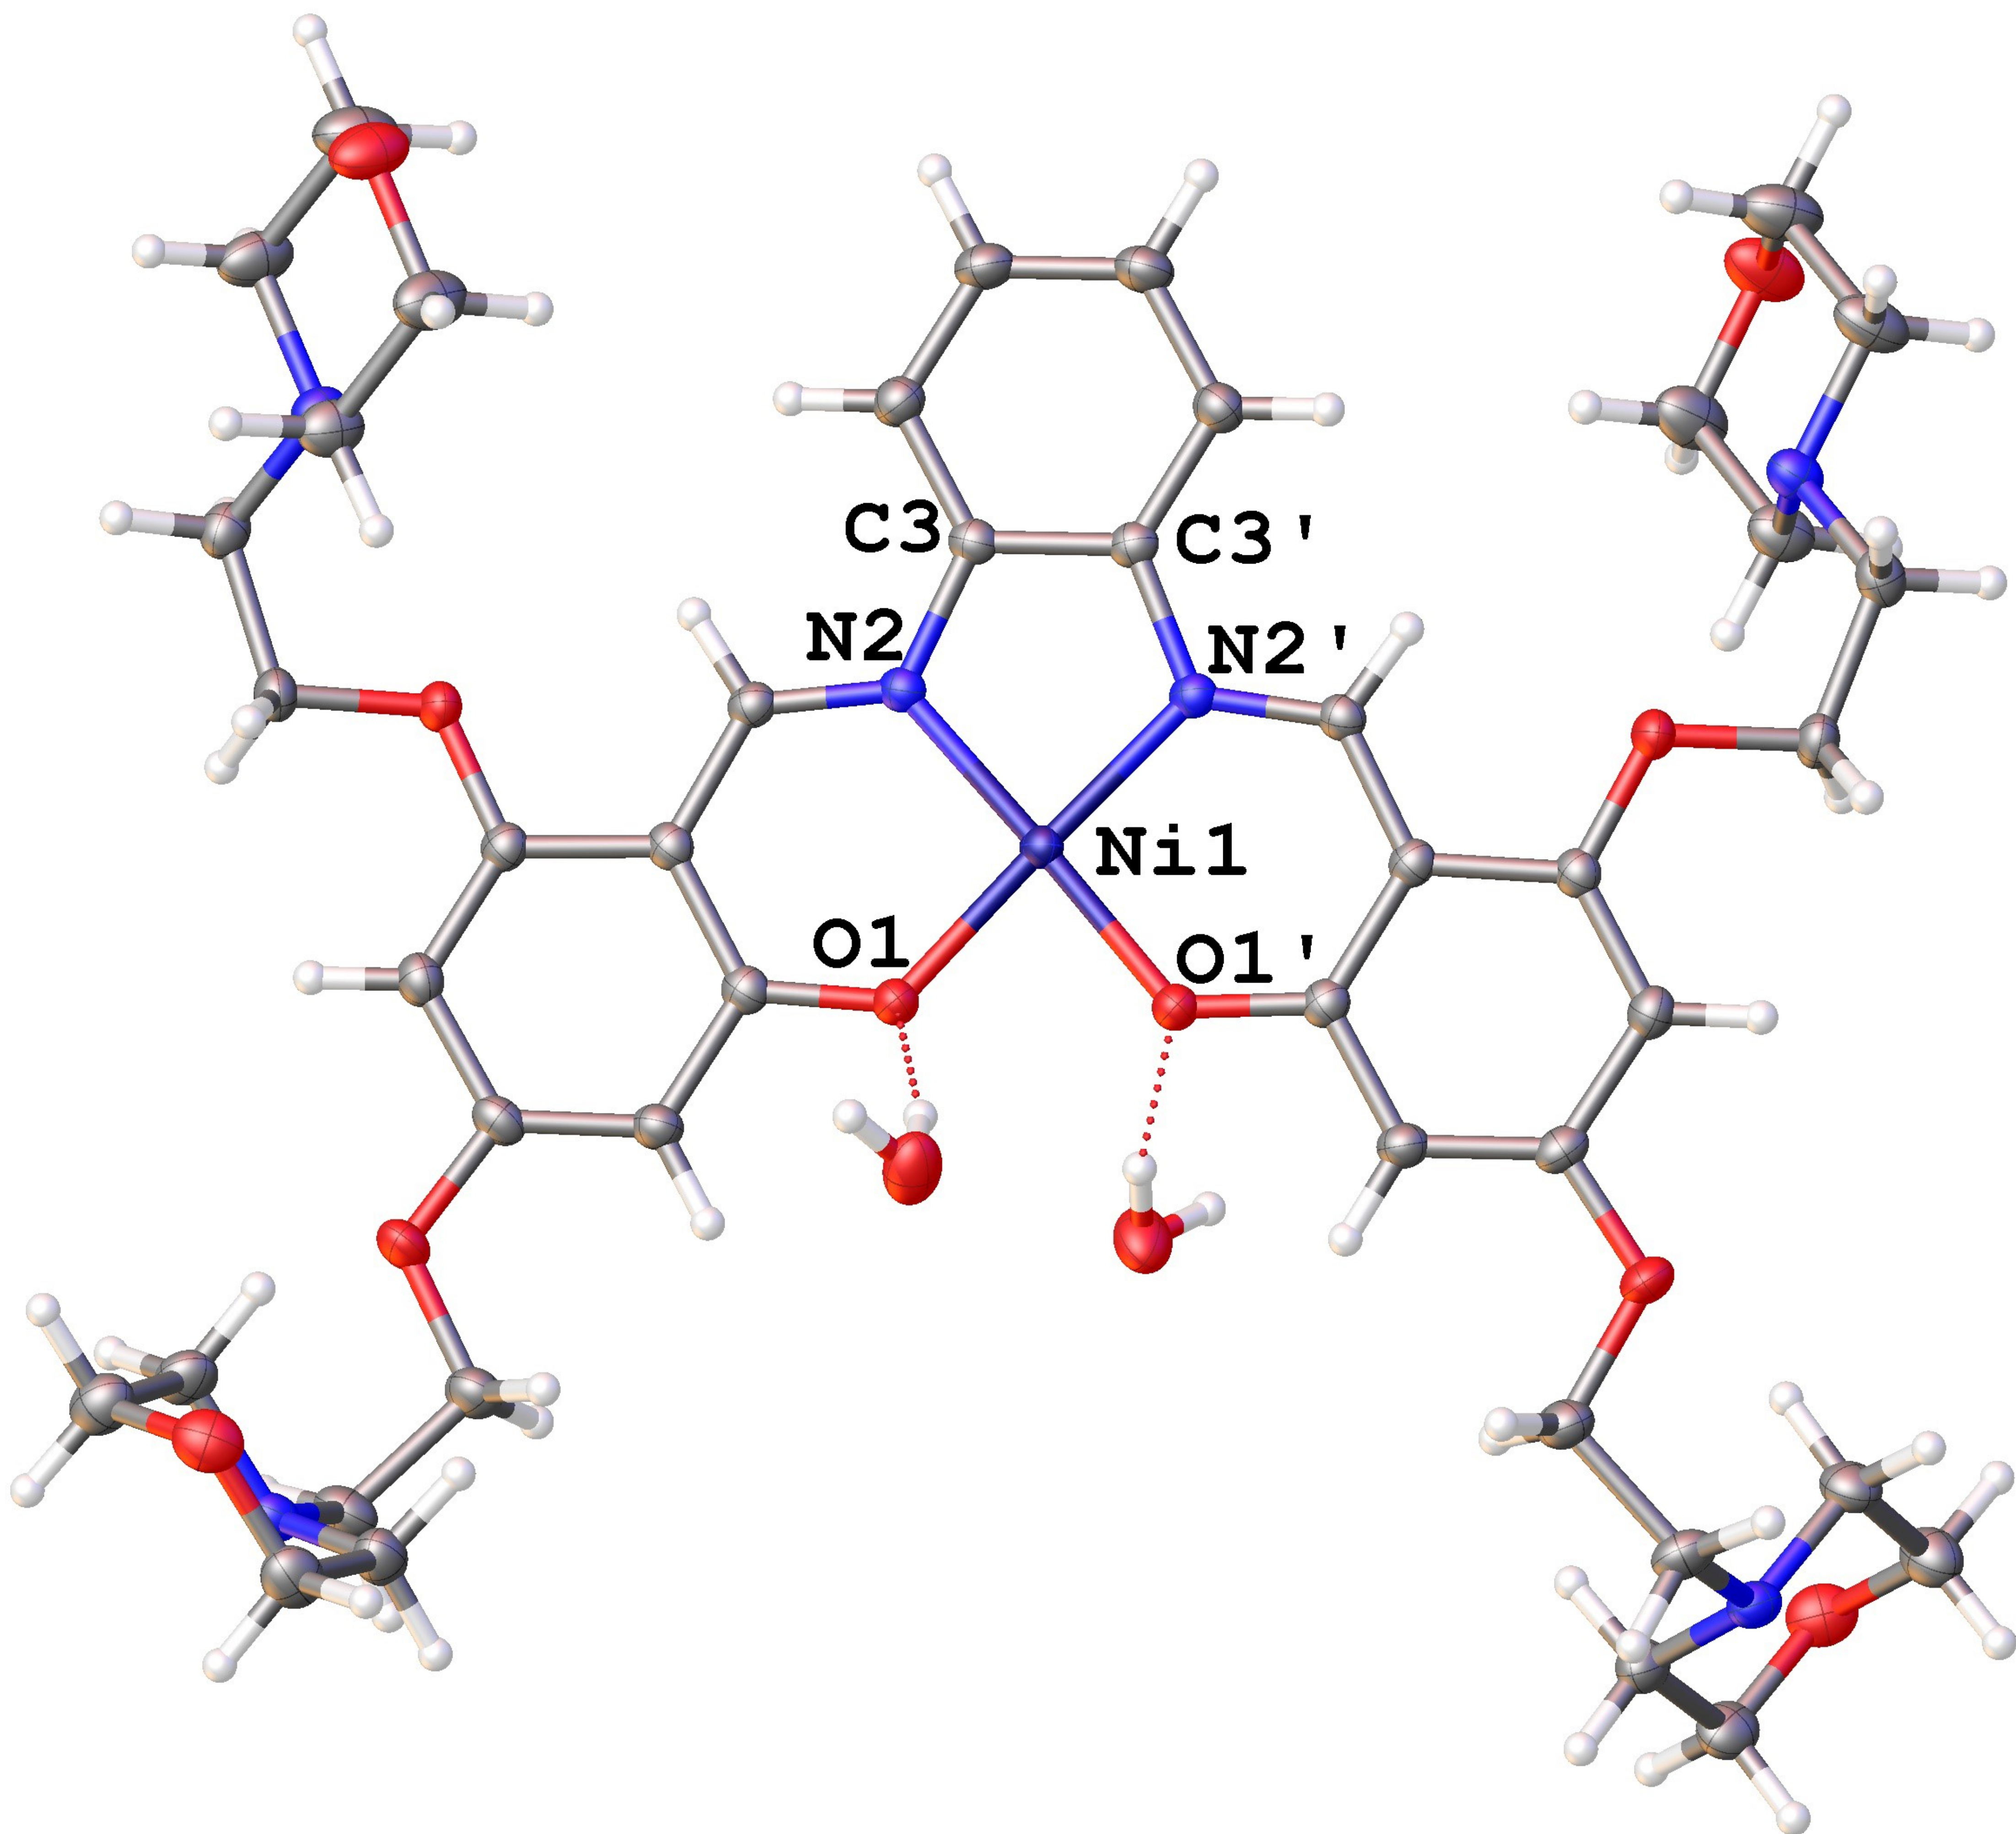

Supplement: d3dt02040a1.pdf [file d3dt02040a1.pdf]
